# Supplementary material for: Tunable structural phases and electronic properties of group V MSi2N4 (M = V, Nb, Ta) nanosheets via surface hydrogenation: a first-principles study
Source: Royal Society of Chemistry journal article supplement (doi:10.1039/d3tc02881j), 2023-01-01
Supplement: d3tc02881j1.pdf [file d3tc02881j1.pdf]

**Tunable Structural Phases and Electronic Properties of Group V  $\text{MSi}_2\text{N}_4$  (M=V, Nb, Ta) nanosheets via Surface Hydrogenation: A First-Principles Study**

Yanli Wang<sup>1, a)</sup> and Yi Ding<sup>2, b)</sup>

<sup>1)</sup>*Department of Physics, Zhejiang Sci-Tech University, Hangzhou, Zhejiang 310018, People's Republic of China*

<sup>2)</sup>*School of Physics, Hangzhou Normal University, Hangzhou, Zhejiang 311121, People's Republic of China*

(Dated: 26 October 2023)

---

<sup>a)</sup>Y. Wang: wangyanli-04@tsinghua.org.cn

<sup>b)</sup>Y. Ding: dingyi2001@tsinghua.org.cn

Figure S1: The AIMD simulations of  $\text{NbSi}_2\text{N}_4\text{H}_1$  nanosheets at 300 K.

Figure S2: The COHP analysis of  $\text{NbSi}_2\text{N}_4\text{H}_1$  nanosheets.

Figures S3 and S4: The atomic structures of  $\text{NbSi}_2\text{N}_4\text{H}_x$  systems.

Figure S5: The strain and electric field effects on the energy differences.

Figure S6: The charge injection influence on the energy differences.

Figure S7: The AIMD simulation of pristine  $\text{NbSi}_2\text{N}_4$  systems.

Figure S8: The band structures of  $\text{NbSi}_2\text{N}_4\text{H}_x$  ( $x \neq 0, 1, 2$ ) nanosheets.

Figure S9: The stability of  $\text{NbSi}_2\text{N}_4\text{H}_1$  system under the electric fields.

Figure S10: The band structures of  $\text{NbSi}_2\text{N}_4\text{H}_x$  ( $x = 0, 2$ ) under the electric fields.

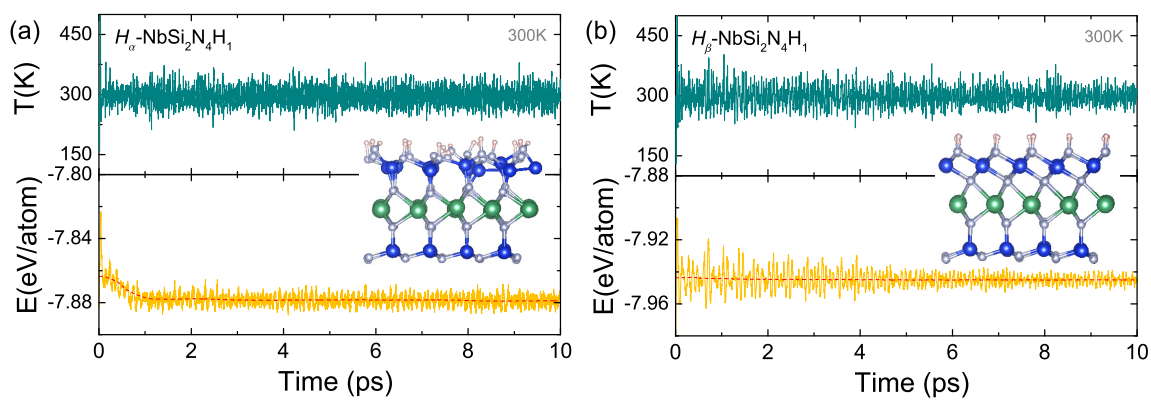

Figure S1: The AIMD simulation results of (a)  $H_\alpha$ -NbSi<sub>2</sub>N<sub>4</sub>H<sub>1</sub> and (b)  $H_\beta$ -NbSi<sub>2</sub>N<sub>4</sub>H<sub>1</sub> nanosheets under a temperature of 300 K.

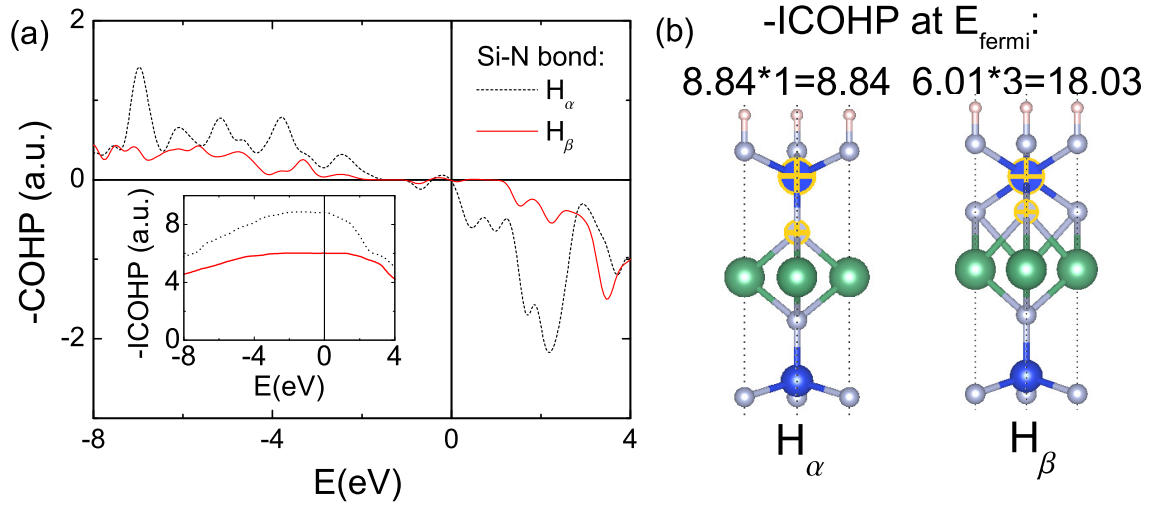

Figure S2: (a) The -COHP functions of Si-N<sub>i</sub> bonds that connect the hydrogenated SiN surface layer and the inner NbN<sub>2</sub> part. The integral of -COHP (-ICOHP) is also depicted in the inset. (b) The lateral view of  $H_\alpha$ - and  $H_\beta$ -NbSi<sub>2</sub>N<sub>4</sub>H<sub>1</sub> nanosheets, where the Si-N<sub>i</sub> bonds are marked. It can be seen that there is one and three Si-N<sub>i</sub> bonds per formula unit in the  $H_\alpha$ - and  $H_\beta$ -phase structures, respectively. The corresponding -ICOHP values at the Fermi level per formula unit are also noted.

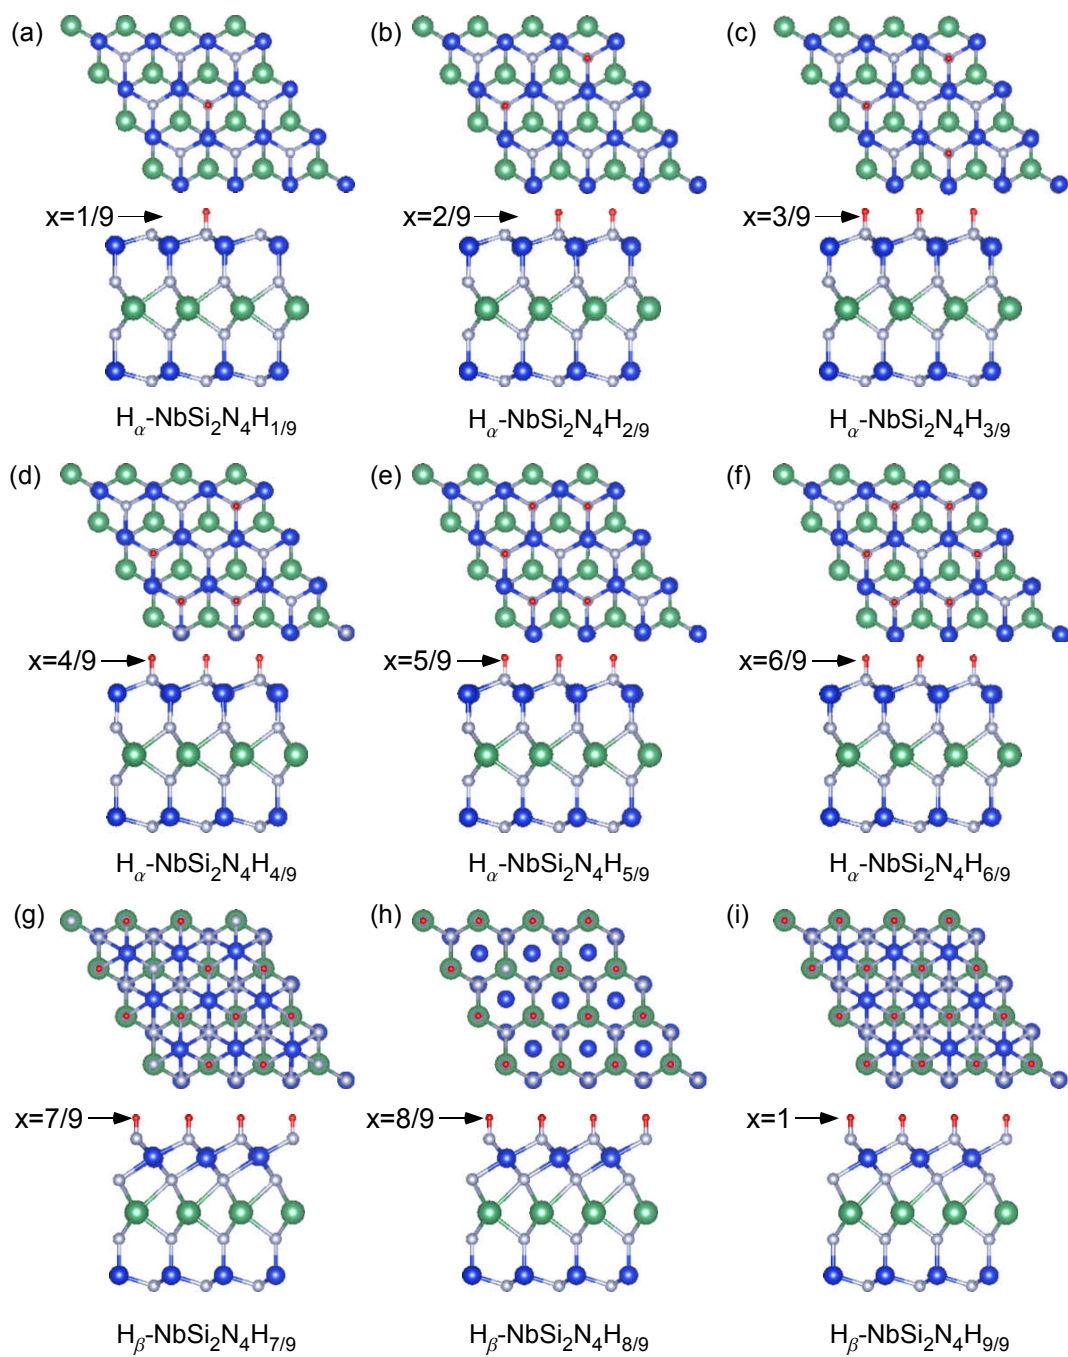

Figure S3: The geometrical structures of  $\text{NbSi}_2\text{N}_4\text{H}_x$  nanosheets with  $x = 1/9 \sim 1$ . The Nb, Si, N and H atoms are represented by green, blue, grey and red balls, respectively.

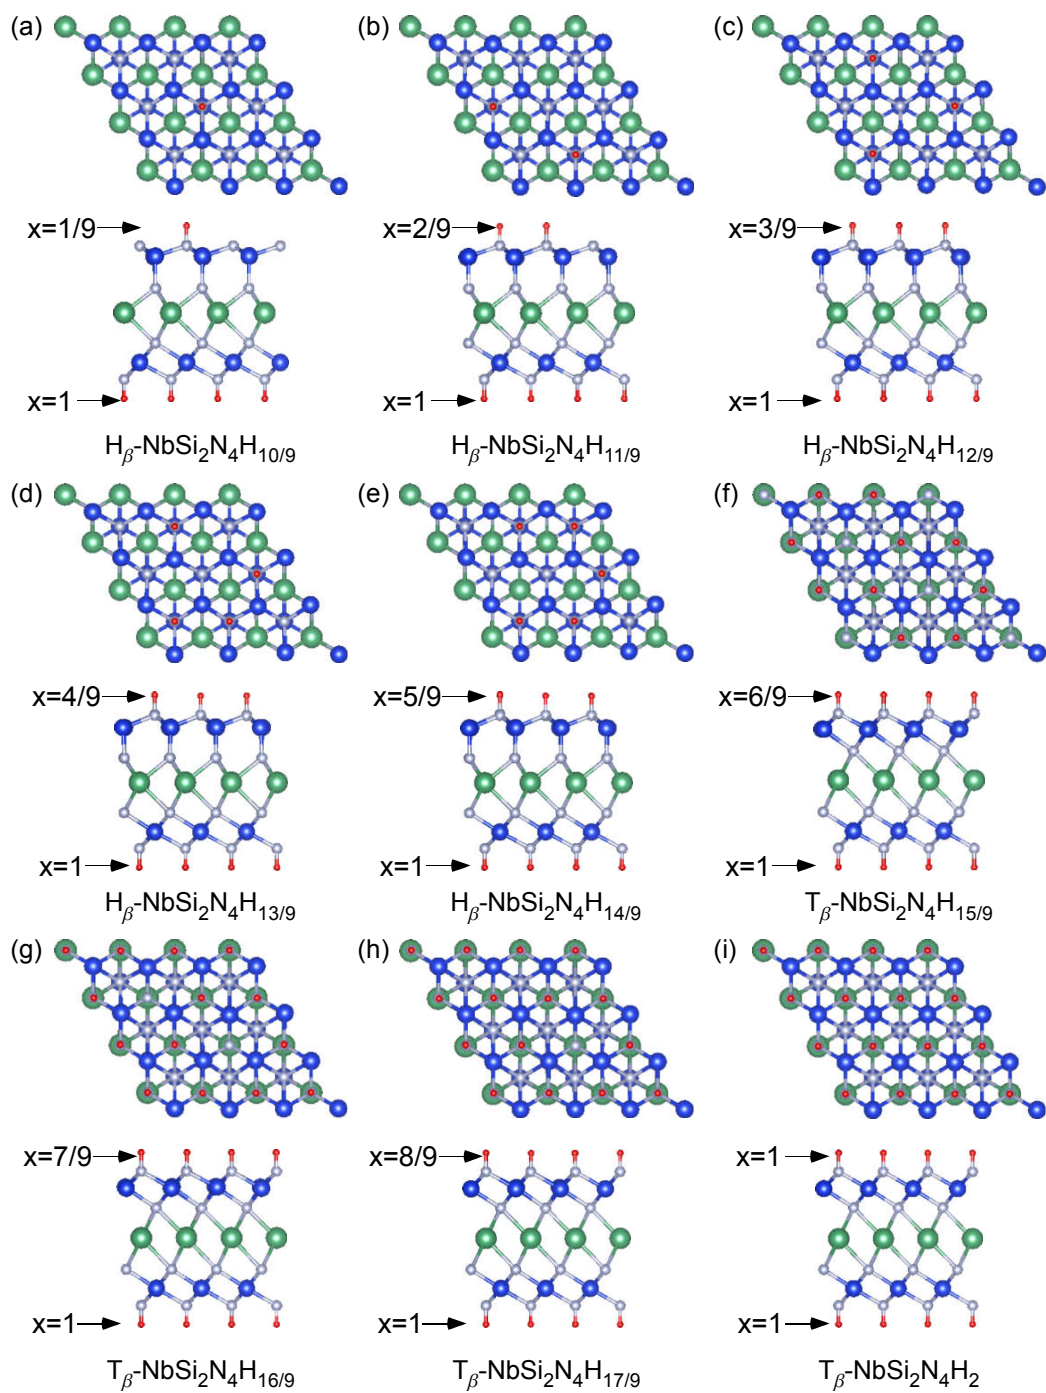

Figure S4: The geometrical structures of  $\text{NbSi}_2\text{N}_4\text{H}_x$  nanosheets with  $x = 10/9 \sim 2$ . The Nb, Si, N and H atoms are represented by green, blue, grey and red balls, respectively.

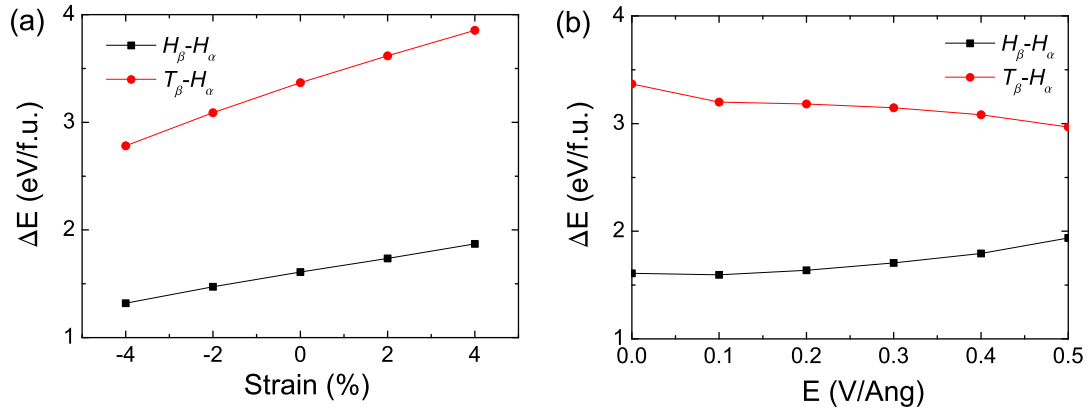

Figure S5: The variations of energy differences between the  $H_\beta/T_\beta$ - and  $H_\alpha$ -NbSi<sub>2</sub>N<sub>4</sub> nanosheets under the (a) strain and (b) electric field modulations. It can be seen that the  $H_\alpha$ -phase geometry is always favored in these NbSi<sub>2</sub>N<sub>4</sub> nanosheets.

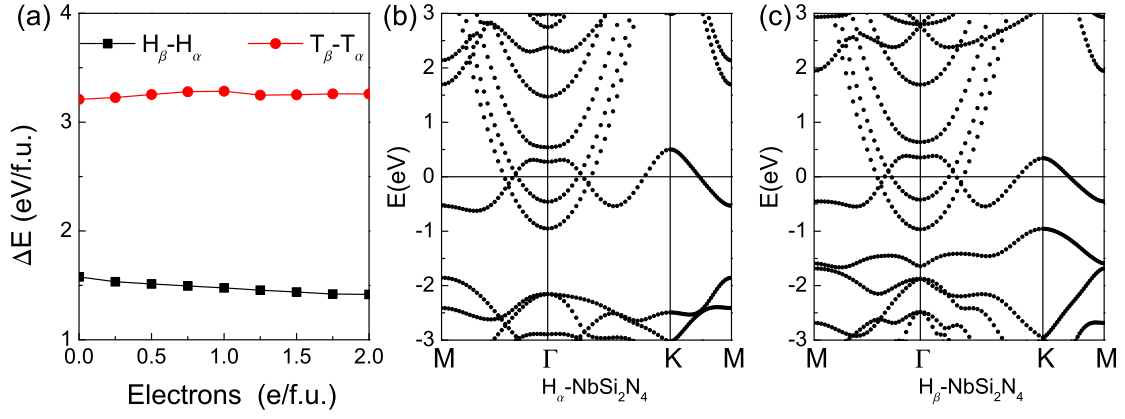

Figure S6: (a) The variations of energy differences between the  $H_\beta/T_\beta$ - and  $H_\alpha$ -NbSi<sub>2</sub>N<sub>4</sub> nanosheets with the different injected electron amount. The band structures of (b) doped  $H_\alpha$ - and (b)  $H_\beta$ -NbSi<sub>2</sub>N<sub>4</sub> nanosheets with injected electron amount of 1 e/f.u.. The  $H_\alpha$ -phase geometry is preferred for the doped NbSi<sub>2</sub>N<sub>4</sub> nanosheet and it exhibit different band structures from the semihydrogenated NbSi<sub>2</sub>N<sub>4</sub>H<sub>1</sub> one.



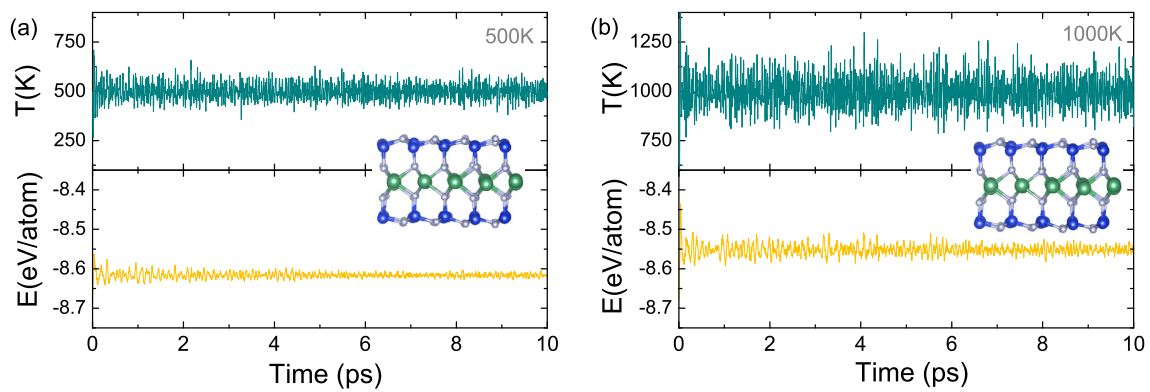

Figure S7: The AIMD simulation results for the pristine H-phase  $NbSi_2N_4$  nanosheet under the temperatures of (a) 500 K and (b) 1000 K, respectively.

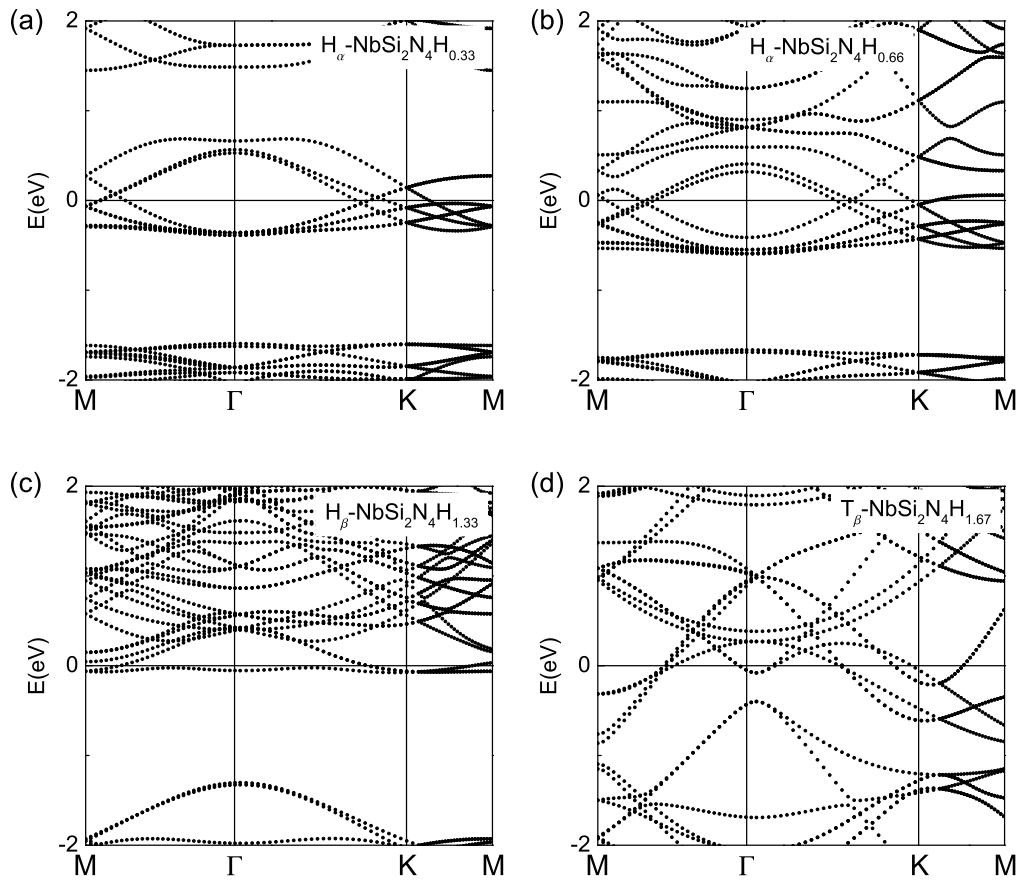

Figure S8: The band structures of (a)  $H_{\alpha}$ -NbSi<sub>2</sub>N<sub>4</sub>H<sub>0.33</sub>, (b)  $H_{\alpha}$ -NbSi<sub>2</sub>N<sub>4</sub>H<sub>0.67</sub>, (c)  $H_{\beta}$ -NbSi<sub>2</sub>N<sub>4</sub>H<sub>1.33</sub> and (d)  $T_{\beta}$ -NbSi<sub>2</sub>N<sub>4</sub>H<sub>1.67</sub> nanosheets.

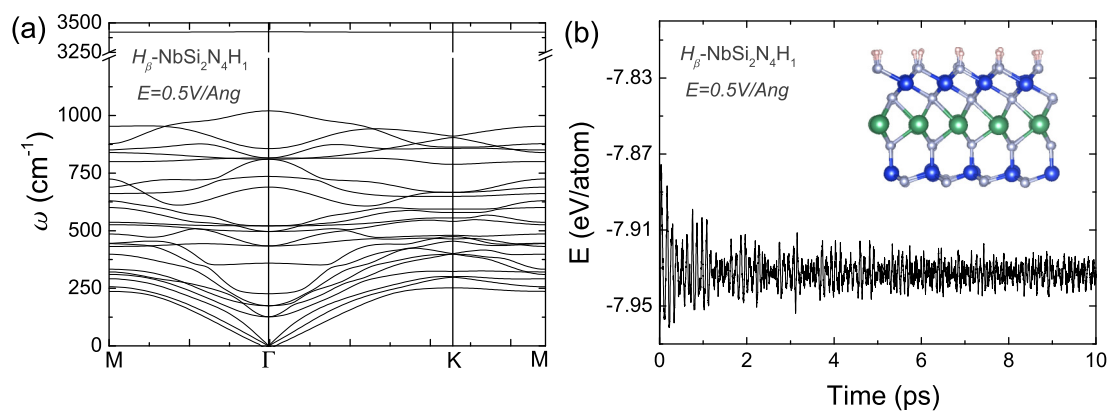

Figure S9: The phonon dispersions and AIMD simulation results of  $H_\beta\text{-NbSi}_2\text{N}_4\text{H}_1$  nanosheet under the electric field of  $E = 0.5 \text{ V/\AA}$ .

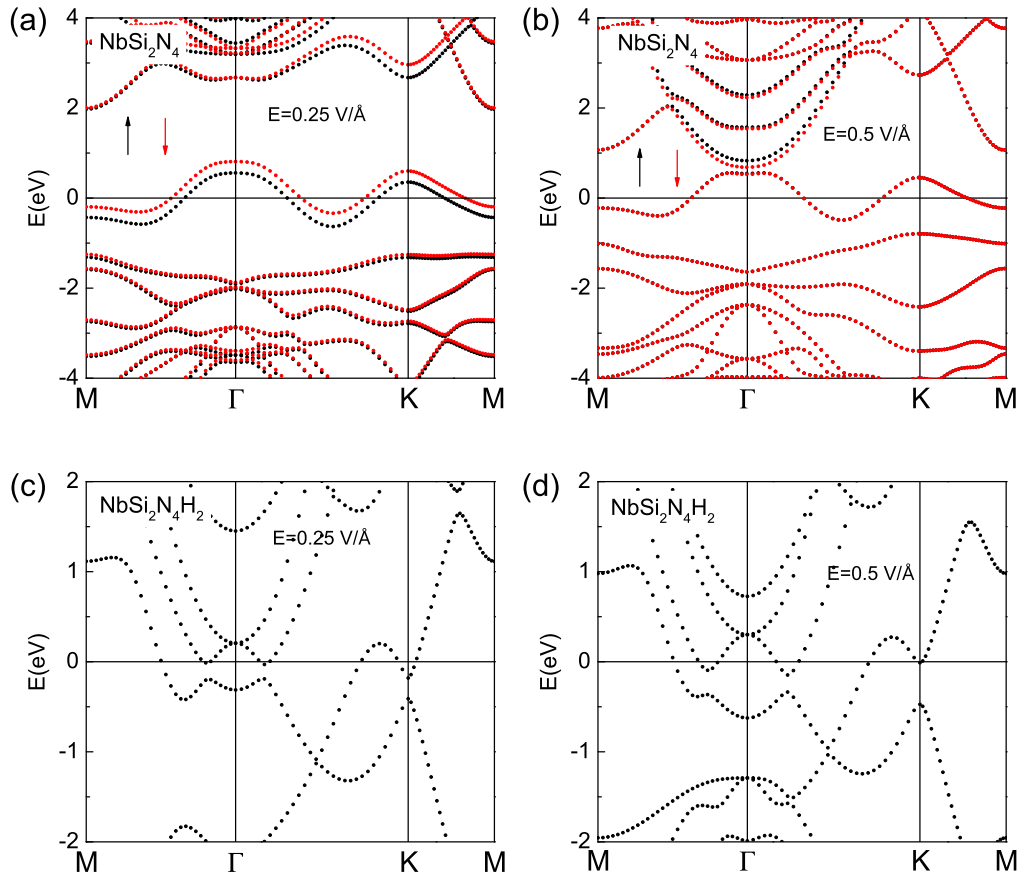

Figure S10: (a)-(b) The band structures of pristine  $H_\alpha$ - $NbSi_2N_4$  nanosheet at the ferromagnetic state under the electric field of  $E=0.25$  and  $0.5$  V/Å. (c)-(d) The band structures of  $T_\beta$ - $NbSi_2N_4H_2$  nanosheet under the electric field of  $0.25$  and  $0.5$  V/Å.
